# Supplementary material for: The novel putative methyltransferase METTL7A as one prognostic biomarker potentially associated with immune infiltration in human renal cancer
Source: PubMed Central journal article supplement — Heliyon. 2023 Apr 11;9(4):e15371. doi: 10.1016/j.heliyon.2023.e15371 (PMC10133759; doi:10.1016/j.heliyon.2023.e15371), 2023-04-11
Supplement: mmc1.pdf [file mmc1.pdf]

Supplementary Figure S1

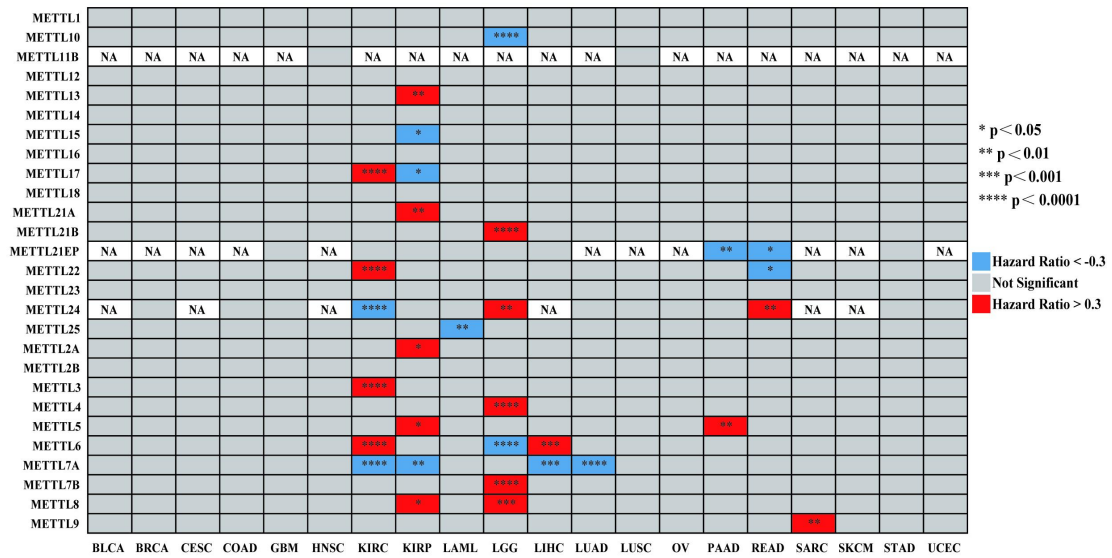

**SUPPLEMENTARY FIGURE S1** Our previous study demonstrated that METTL family members were highly associated with the risk of renal cancer, rather than other cancers, as analyzed using univariate Cox regression analysis.

Supplementary Figure S2

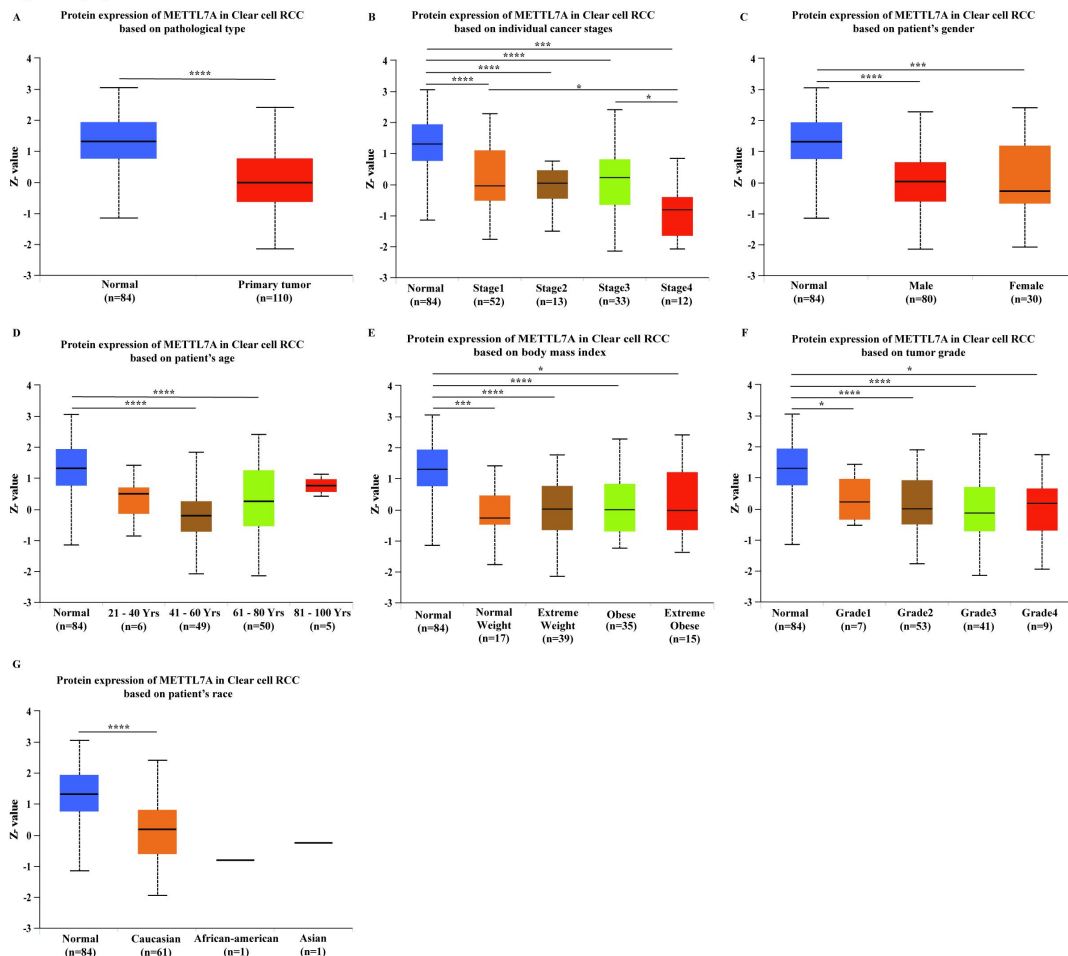

**SUPPLEMENTARY FIGURE S2** Box plots showed the protein expression of **METTL7A** among different kidney renal clear cell carcinoma (KIRC) patient groups. Analysis was shown for protein expression of METTL7A between (A) normal tissues and primary tumors, different (B) cancer stages, (C) races, (D) sex, (E) ages, (F) body mass indexes (BMI), (G) and grades.

Supplementary Figure S3

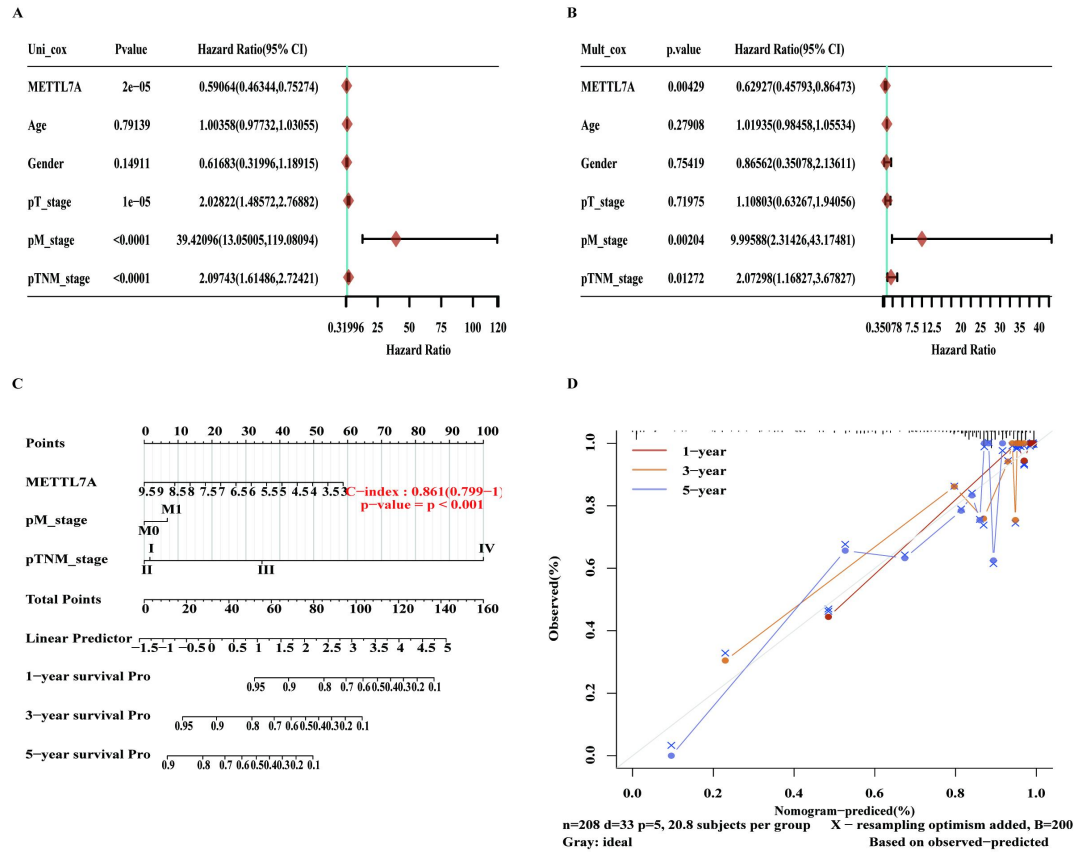

**SUPPLEMENTARY FIGURE S3** METTL7A as one potential independent prognostic factor in renal papillary cell carcinoma (KIRP). (A, B) By univariate and multivariate Cox regression analysis, METTL7A was identified as a putative independent prognostic factor for KIRP. (C, D) The nomogram revealed that METTL7A could predict the 1-, 3-, and 5-year survival rates of KIRP patients when combined with other clinical markers.

Supplementary Figure S4

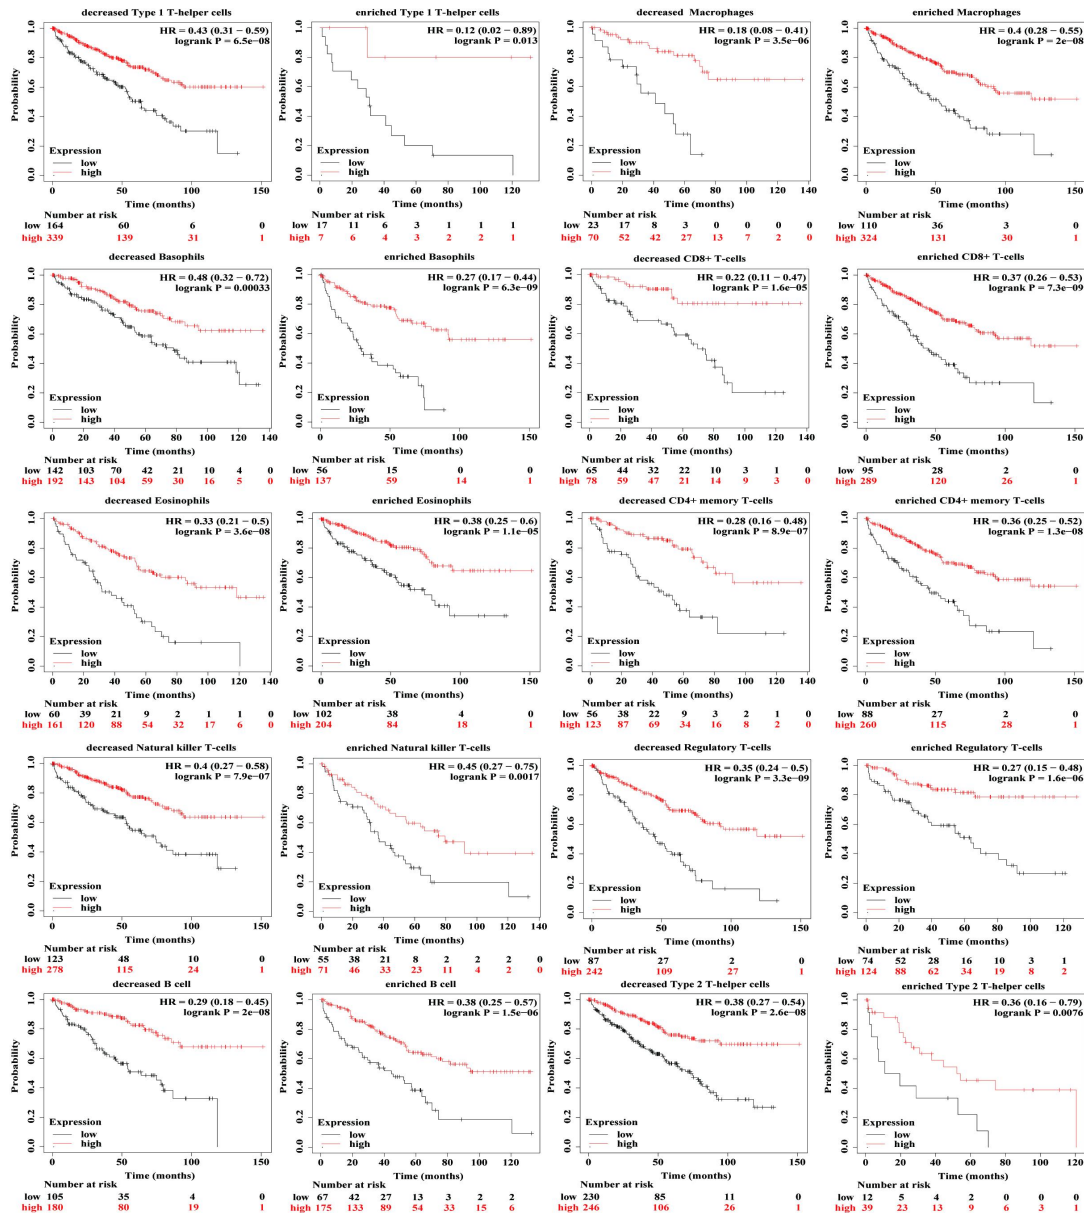

**SUPPLEMENTARY FIGURE S4 METTL7A might influence the overall survival of KIRC patients by controlling immune cell infiltration. Kaplan-Meier survival curve of METTL7A in KIRC patients with immune cell infiltration at high or low levels.**
